# Supplementary material for: Wound healing and longevity: Lessons from long-lived αMUPA mice
Source: Aging (Albany NY). 2015 Feb 24;7(3):167–76. doi: 10.18632/aging.100726 (PMC4394728; doi:10.18632/aging.100726)
Supplement: Supplementary file 1 [file aging-07-0167-s001.xlsx]

## Sheet: supl. 1 - KEGG day 0
Dataset S1
KEGG enrichment analysis of aged-related changes in intact skin of WT and αMUPA mice. The comparison was made between aged (24-25 months) and young adult (4-5 months) mice.
Note:
1) Enrichment tested only on genes differentially expressed with statistical significance of B < 0.05 (Benjamini Hochberg adjustment of P value)
2) Details on KEGG statistics and terms are available at the DAVID Bioinformatics Resources 6.7 website: http://david.abcc.ncifcrf.gov/
FVB/N (WT)						αMUPA
Pathway	Count	%	P value	Fold Enrichment	Bonferroni	Pathway	Count	%	P value	Fold Enrichment	Bonferroni
Spliceosome	46	1.40759	5.88249e-09	2.41339	1.08826e-06	Dilated cardiomyopathy	7	4.57516	4.12654e-05	10.3949	0.00354261
Colorectal cancer	30	0.917993	1.62102e-05	2.26942	0.00299441	Cardiac muscle contraction	6	3.92157	0.000208479	10.5092	0.0177713
Apoptosis	30	0.917993	2.08268e-05	2.24333	0.00384559	Hypertrophic cardiomyopathy (HCM)	6	3.92157	0.000295431	9.7585	0.0250907
Ubiquitin mediated proteolysis	40	1.22399	4.53918e-05	1.91343	0.00836251	MAPK signaling pathway	7	4.57516	0.0105618	3.60881	0.598741
Insulin signaling pathway	40	1.22399	6.48102e-05	1.8857	0.0119187	Tight junction	5	3.26797	0.0151349	5.05996	0.730599
B cell receptor signaling pathway	27	0.826193	8.97223e-05	2.19566	0.0164624	Glycolysis / Gluconeogenesis	3	1.96078	0.0844633	6.02731	0.999494
Glioma	23	0.703794	0.000122348	2.33797	0.0223816
Endometrial cancer	20	0.611995	0.000140244	2.50218	0.0256133
mTOR signaling pathway	20	0.611995	0.000248678	2.40951	0.0449687
Prostate cancer	28	0.856793	0.00029724	2.02399	0.0535126
Pancreatic cancer	23	0.703794	0.000801747	2.0782	0.137899
Fc epsilon RI signaling pathway	25	0.764994	0.000938234	1.98344	0.159413
Leukocyte transendothelial migration	32	0.979192	0.00159265	1.74942	0.255376
Progesterone-mediated oocyte maturation	25	0.764994	0.00162696	1.91343	0.260095
Tight junction	35	1.07099	0.00181097	1.68665	0.2849
T cell receptor signaling pathway	31	0.948592	0.00281773	1.70912	0.406677
RNA degradation	19	0.581395	0.0029271	2.06013	0.418594
Neurotrophin signaling pathway	33	1.00979	0.00358328	1.65144	0.485262
Oocyte meiosis	30	0.917993	0.00373534	1.69713	0.499592
Melanoma	21	0.642595	0.00397627	1.92421	0.521489
Natural killer cell mediated cytotoxicity	31	0.948592	0.00479094	1.65308	0.588709
Non-small cell lung cancer	17	0.520196	0.00560494	2.04808	0.646485
Aldosterone-regulated sodium reabsorption	14	0.428397	0.00810015	2.16856	0.7779
VEGF signaling pathway	21	0.642595	0.00903707	1.79762	0.813525
Chronic myeloid leukemia	21	0.642595	0.00903707	1.79762	0.813525
Wnt signaling pathway	35	1.07099	0.0095545	1.52818	0.8307
Nucleotide excision repair	14	0.428397	0.0100215	2.11812	0.844846
Chemokine signaling pathway	41	1.25459	0.0100677	1.46556	0.846178
DNA replication	12	0.367197	0.0127499	2.23052	0.906882
MAPK signaling pathway	55	1.68299	0.0149171	1.35023	0.937989
Pathways in cancer	65	1.98898	0.0156132	1.30919	0.945591
Cell cycle	30	0.917993	0.0174908	1.52477	0.961781
Basal transcription factors	11	0.336597	0.0223187	2.16856	0.984636
Type II diabetes mellitus	14	0.428397	0.0299004	1.85876	0.996361
Renal cell carcinoma	18	0.550796	0.0328652	1.67289	0.997934
Long-term potentiation	18	0.550796	0.0328652	1.67289	0.997934
Purine metabolism	34	1.04039	0.0335051	1.40887	0.998172
Pentose phosphate pathway	9	0.275398	0.0359702	2.25196	0.99886
ErbB signaling pathway	21	0.642595	0.0378315	1.57033	0.999203
Fc gamma R-mediated phagocytosis	23	0.703794	0.0388354	1.52684	0.999343
Mismatch repair	8	0.244798	0.0408999	2.3657	0.999559
Acute myeloid leukemia	15	0.458996	0.0458253	1.71202	0.99983
Endocytosis	41	1.25459	0.0492665	1.32046	0.999913
Small cell lung cancer	20	0.611995	0.0542957	1.53075	0.999967
Pyrimidine metabolism	22	0.673195	0.0547584	1.49088	0.99997
Cell adhesion molecules (CAMs)	32	0.979192	0.0638084	1.35183	0.999995
Thyroid cancer	9	0.275398	0.0651973	2.019	0.999996
TGF-beta signaling pathway	20	0.611995	0.0663235	1.49556	0.999997
Focal adhesion	39	1.19339	0.0799887	1.28142	1
p53 signaling pathway	16	0.489596	0.0983142	1.50856	1

## Sheet: Legend
Supplementary Table 1
KEGG enrichment analysis of aged-related changes in intact skin of WT and αMUPA mice
* Enrichment was tested only on differentially expressed genes with statistical significance of B < 0.05 (Benjamini Hochberg adjustment of P value)
* All enrichment tests were performed using the DAVID: Functional Annotation Tool database, build 6.7
for exact calculation formulas please refer to:	http://david.abcc.ncifcrf.gov
Term	Descriptor
Count	The number of genes from the tested list related to the pathway
%	count / total genes tested described as percentage
P value	Modified Fisher exact P-Value, EASE Score (for details see: http://david.abcc.ncifcrf.gov/helps/functional_annotation.html#E3)
Fold Enrichment	The magnitude of enrichment for each KEGG pathway compared with the entire mouse genome that serves as the reference
Bonferroni	Bonferroni correction for the familywise error rate
Benjamini	Benjamini correction
FDR	False Discovery Rate
