# Supplementary material for: Wound healing and longevity: Lessons from long-lived αMUPA mice
Source: Aging (Albany NY). 2015 Feb 24;7(3):167–76. doi: 10.18632/aging.100726 (PMC4394728; doi:10.18632/aging.100726)
Supplement: Supplementary file 2 [file aging-07-0167-s002.xlsx]

## Sheet: supl. 2 - KEGG day 21 v 0
Dataset S2
KEGG enrichment analysis of genes differentially expressed in the skin of aged WT and αMUPA mice, after histologically confirmed full closure of the wound.
Note:
1) Enrichment tested only on genes differentially expressed with statistical significance of B < 0.05 (Benjamini Hochberg adjustment of P value)
2) Details on KEGG statistics and terms are available at the DAVID Bioinformatics Resources 6.7 website: http://david.abcc.ncifcrf.gov/
FVB/N (WT) - aged						αMUPA - aged
Pathway	Count	%	P value	Fold Enrichment	Bonferroni	Pathway	Count	%	P value	Fold Enrichment	Bonferroni
Pathways in cancer	75	3.01326	1.01814e-07	1.8352	1.88354e-05	ECM-receptor interaction	24	1.90174	3.56262e-10	4.72701	5.77145e-08
Ubiquitin mediated proteolysis	37	1.48654	7.93655e-06	2.15024	0.00146719	Focal adhesion	38	3.01109	4.43755e-10	3.13741	7.18883e-08
Colorectal cancer	26	1.0446	3.5971e-05	2.38945	0.00663266	Lysosome	26	2.06022	3.08553e-08	3.57174	4.99855e-06
Pancreatic cancer	23	0.924066	4.54705e-05	2.52476	0.00837695	Chemokine signaling pathway	32	2.53566	1.19016e-07	2.8743	1.92805e-05
Melanogenesis	28	1.12495	7.43231e-05	2.213	0.0136562	Cytokine-cytokine receptor interaction	35	2.77338	3.73396e-06	2.34494	0.000604719
Prostate cancer	26	1.0446	8.25308e-05	2.28326	0.0151529	B cell receptor signaling pathway	17	1.34707	1.93412e-05	3.47386	0.00312841
Renal cell carcinoma	22	0.883889	9.08686e-05	2.48398	0.0166709	Pathways in cancer	36	2.85261	0.000544283	1.82202	0.0844203
Thyroid cancer	13	0.522298	0.000100708	3.54298	0.0184595	Fc gamma R-mediated phagocytosis	16	1.26783	0.000780679	2.66899	0.118843
Chronic myeloid leukemia	23	0.924066	0.000112358	2.39187	0.0205728	Leukocyte transendothelial migration	18	1.42631	0.000802624	2.47274	0.121972
Citrate cycle (TCA cycle)	13	0.522298	0.000215232	3.31441	0.0390397	Small cell lung cancer	14	1.10935	0.00173904	2.69254	0.245704
Wnt signaling pathway	35	1.40619	0.000346705	1.85655	0.0621371	Natural killer cell mediated cytotoxicity	17	1.34707	0.00281533	2.27794	0.366647
Neurotrophin signaling pathway	31	1.24548	0.000623968	1.8847	0.109053	Fc epsilon RI signaling pathway	13	1.03011	0.00376833	2.59169	0.45753
Regulation of actin cytoskeleton	45	1.80796	0.000801071	1.63899	0.137791	Prion diseases	8	0.633914	0.00450189	3.73659	0.51855
Aldosterone-regulated sodium reabsorption	14	0.562475	0.00142868	2.63453	0.232407	T cell receptor signaling pathway	16	1.26783	0.00508413	2.21662	0.562085
B cell receptor signaling pathway	21	0.843712	0.00176836	2.07469	0.279231	Colorectal cancer	13	1.03011	0.00558592	2.47115	0.596451
Long-term potentiation	19	0.763359	0.00210594	2.14526	0.32295	Gap junction	13	1.03011	0.00558592	2.47115	0.596451
Apoptosis	22	0.883889	0.00219641	1.99861	0.334211	Renal cell carcinoma	11	0.871632	0.00935469	2.56891	0.781855
Small cell lung cancer	21	0.843712	0.00380574	1.95265	0.506092	Pancreatic cancer	11	0.871632	0.011353	2.49755	0.842718
Endometrial cancer	15	0.602652	0.0040761	2.27988	0.530281	Apoptosis	12	0.950872	0.0159782	2.25484	0.92642
Bladder cancer	13	0.522298	0.00452285	2.44635	0.567696	Primary immunodeficiency	7	0.554675	0.0202771	3.1787	0.963798
ErbB signaling pathway	21	0.843712	0.00504229	1.90776	0.607486	TGF-beta signaling pathway	11	0.871632	0.0379486	2.06694	0.998103
TGF-beta signaling pathway	21	0.843712	0.00504229	1.90776	0.607486	Glioma	9	0.713154	0.0393951	2.29888	0.998513
Adherens junction	19	0.763359	0.00547636	1.9759	0.637928	Chronic myeloid leukemia	10	0.792393	0.040446	2.151	0.998755
T cell receptor signaling pathway	26	1.0446	0.00578841	1.74147	0.65835	Intestinal immune network for IgA production	8	0.633914	0.0442015	2.42186	0.99934
Insulin signaling pathway	29	1.16513	0.00677456	1.6609	0.715652	Cell adhesion molecules (CAMs)	16	1.26783	0.0476017	1.69845	0.99963
Pantothenate and CoA biosynthesis	7	0.281237	0.00726265	3.68834	0.740369	Glycosaminoglycan degradation	5	0.396197	0.0479818	3.55382	0.999653
Fatty acid metabolism	13	0.522298	0.00823904	2.28326	0.78358	Glycosphingolipid biosynthesis	4	0.316957	0.0495699	4.67074	0.999735
Focal adhesion	38	1.52672	0.00840815	1.51685	0.790301	Glycosphingolipid biosynthesis	5	0.396197	0.0549145	3.40575	0.999894
Pyruvate metabolism	12	0.482121	0.0106926	2.31324	0.863138	Axon guidance	14	1.10935	0.0552349	1.74707	0.999899
Glioma	16	0.642828	0.0118406	1.9759	0.889594	Endocytosis	19	1.50555	0.0662209	1.53764	0.999985
Melanoma	17	0.683005	0.013889	1.89241	0.92479	Toll-like receptor signaling pathway	11	0.871632	0.0782886	1.8164	0.999998
ECM-receptor interaction	19	0.763359	0.0139752	1.80925	0.925997	O-Glycan biosynthesis	5	0.396197	0.0787424	3.02733	0.999998
mTOR signaling pathway	14	0.562475	0.014802	2.04908	0.936635	NOD-like receptor signaling pathway	8	0.633914	0.0815927	2.10936	0.999999
Non-small cell lung cancer	14	0.562475	0.014802	2.04908	0.936635	ErbB signaling pathway	10	0.792393	0.0818184	1.87903	0.999999
PPAR signaling pathway	18	0.723182	0.0179101	1.80082	0.964683	Complement and coagulation cascades	9	0.713154	0.0849338	1.96171	0.999999
Axon guidance	26	1.0446	0.0213973	1.56865	0.981711	Prostate cancer	10	0.792393	0.0963802	1.8164	1
Arrhythmogenic right ventricular cardiomyopathy (ARVC)	17	0.683005	0.0229564	1.79148	0.986383
Lysosome	24	0.964243	0.0231715	1.594	0.986927
Valine, leucine and isoleucine degradation	12	0.482121	0.0251466	2.0618	0.99101
Oocyte meiosis	23	0.924066	0.0289175	1.58072	0.995611
Huntington's disease	33	1.32583	0.0331013	1.42524	0.998025
Dilated cardiomyopathy	19	0.763359	0.0371454	1.63226	0.999091
Acute myeloid leukemia	13	0.522298	0.0494808	1.80257	0.999916
VEGF signaling pathway	16	0.642828	0.0505053	1.66391	0.999931
Oxidative phosphorylation	24	0.964243	0.0571229	1.45912	0.999981
N-Glycan biosynthesis	11	0.441945	0.0575765	1.88999	0.999983
GnRH signaling pathway	19	0.763359	0.0583842	1.54812	0.999985
MAPK signaling pathway	43	1.7276	0.06766	1.28247	0.999998
Protein export	4	0.160707	0.0690455	3.95179	0.999998
Parkinson's disease	24	0.964243	0.0706005	1.42621	0.999999
Propanoate metabolism	8	0.321414	0.0754541	2.10762	1
Tight junction	24	0.964243	0.0807135	1.40508	1
Type II diabetes mellitus	11	0.441945	0.0824472	1.77427	1
Butanoate metabolism	9	0.361591	0.0866621	1.92249	1
p53 signaling pathway	14	0.562475	0.0887635	1.60363	1
SNARE interactions in vesicular transport	9	0.361591	0.0982529	1.8719	1

## Sheet: Legend
Supplementary Table 2
KEGG enrichment analysis of genes differentially expressed in the skin of aged animals after histologically confirmed full closure of the wound; WT and αMUPA mice
* Enrichment was tested only on differentially expressed genes with statistical significance of B < 0.05 (Benjamini Hochberg adjustment of P value)
* All enrichment tests were performed using the DAVID: Functional Annotation Tool database, build 6.7
for exact calculation formulas please refer to:	http://david.abcc.ncifcrf.gov
Term	Descriptor
Count	The number of genes from the tested list related to the pathway
%	count / total genes tested described as percentage
P value	Modified Fisher exact P-Value, EASE Score (for details see: http://david.abcc.ncifcrf.gov/helps/functional_annotation.html#E3)
Fold Enrichment	The magnitude of enrichment for each KEGG pathway compared with the entire mouse genome that serves as the reference
Bonferroni	Bonferroni correction for the familywise error rate
Benjamini	Benjamini correction
FDR	False Discovery Rate
