# Supplementary material for: Wound healing and longevity: Lessons from long-lived αMUPA mice
Source: Aging (Albany NY). 2015 Feb 24;7(3):167–76. doi: 10.18632/aging.100726 (PMC4394728; doi:10.18632/aging.100726)
Supplement: Supplementary file 3 [file aging-07-0167-s003.xlsx]

## Sheet: Sheet1
Dataset S3
Genes common to growth-promoting pathways enriched in old WT mice after full wound closure and their expression in Day 0 and old αMUPA mice
Note:
1) adj.p.value stands for Benjamini Hochberg adjustment of P value
			MUPA old day 21 vs 0		WT day 0 old vs young
abrrev	Common name	ENTREZ	Log2 Fold change	adj.p.value	Fold change	adj.p.value
Camk2g	calcium/calmodulin-dependent protein kinase II gamma	12325	-0.10817	0.897	0.271479	0.355331
Cbl	Casitas B-lineage lymphoma	12402	1.62403	0.0109954	0.597099	0.0800249
Crebbp	CREB binding protein	12914	0.946816	0.132099	0.763807	0.0215026
Crkl	v-crk sarcoma virus CT10 oncogene homolog (avian)-like	12929	0.34551	0.607089	0.430758	0.0405076
Gab1	growth factor receptor bound protein 2-associated protein 1	14388	0.362979	0.589988	0.178555	0.404818
Ins2	insulin II	16334	-0.473225	0.441676	-1.02794	0.0186309
Irs1	insulin receptor substrate 1	16367	0.960866	0.200882	0.772956	0.045933
Jun	Jun oncogene	16476	1.54364	0.00552566	0.491249	0.105384
Kras	v-Ki-ras2 Kirsten rat sarcoma viral oncogene homolog	16653	1.6928	0.0869574	1.76463	0.036228
Smad2	MAD homolog 2 (Drosophila)	17126	0.770811	0.179614	0.494403	0.0297708
Smad4	MAD homolog 4 (Drosophila)	17128	0.586093	0.425299	0.867627	0.0243824
Nfatc3	nuclear factor of activated T-cells, cytoplasmic, calcineurin-dependent 3	18021	0.788638	0.216005	0.346085	0.206312
Nras	neuroblastoma ras oncogene	18176	1.25121	0.206995	1.22422	0.0298879
Pik3ca	phosphatidylinositol 3-kinase, catalytic, alpha polypeptide	18706	0.647875	0.485163	0.613753	0.119867
Pik3r1	phosphatidylinositol 3-kinase, regulatory subunit, polypeptide 1 (p85 alpha)	18708	0.756224	0.365987	0.89011	0.0272012
Pik3r3	phosphatidylinositol 3 kinase, regulatory subunit, polypeptide 3 (p55)	18710	2.31952	0.00821764	1.74595	0.0482929
Ppp3ca	protein phosphatase 3, catalytic subunit, alpha isoform	19055	0.508269	0.606321	0.755059	0.0997464
Ppp3cb	protein phosphatase 3, catalytic subunit, beta isoform	19056	1.26745	0.152133	1.54807	0.0215585
Ppp3r1	protein phosphatase 3, regulatory subunit B, alpha isoform (calcineurin B, type I)	19058	1.65241	0.0207958	0.911021	0.0996971
Prkx	protein kinase, X-linked	19108	0.330039	0.650234	0.440976	0.0480936
Rac1	RAS-related C3 botulinum substrate 1	19353	0.94303	0.101371	0.513309	0.0840068
Rheb	Ras homolog enriched in brain	19744	0.770967	0.352952	0.908199	0.0461826
Map2k1	mitogen-activated protein kinase kinase 1	26395	0.563836	0.503705	0.780021	0.04981
Mapk1	mitogen-activated protein kinase 1	26413	0.585246	0.493715	0.864114	0.0254432
Nfat5	nuclear factor of activated T-cells 5	54446	0.746451	0.371608	0.505335	0.112821
1500003O03Rik	RIKEN cDNA 1500003O03 gene	56398	0.425982	0.390292	0.413739	0.046735
Rbx1	ring-box 1	56438	0.251965	0.73184	0.541162	0.0480936
Gsk3b	glycogen synthase kinase 3 beta	56637	0.942408	0.119861	0.726246	0.0252015
Pik3cb	phosphatidylinositol 3-kinase, catalytic, beta polypeptide	74769	0.127279	0.883966	0.676878	0.0187101
Prkaa1	protein kinase, AMP-activated, alpha 1 catalytic subunit	105787	0.926645	0.299059	1.0582	0.0264004
Camk2d	calcium/calmodulin-dependent protein kinase II, delta	108058	1.5322	0.0257231	0.127462	0.759173
